# Supplementary material for: Side chain homologation of alanyl peptide nucleic acids: pairing selectivity and stacking
Source: Royal Society of Chemistry journal article supplement (doi:10.1039/b411545g), 2005-01-01
Supplement: b411545g1.pdf [file b411545g1.pdf]

## Supplementary data

### Side chain homologation of alanyl peptide nucleic acids: pairing selectivity and stacking

Ulf Diederichsen,<sup>\*a</sup> Daniel Weicherding<sup>ab</sup> and Nicola Diezemann<sup>a</sup>

<sup>a</sup> *Institut für Organische und Biomolekulare Chemie, Tammannstr. 2, D-37077 Göttingen, Germany. Fax:*

*+49 551 392944; Tel: +49 551 393221; E-mail: [udieder@gwdg.de](mailto:udieder@gwdg.de)*

<sup>b</sup> *Clondia Chip Technologies GmbH, Löbstedter Str. 103-105, D-07749 Jena, Germany. E-mail:*

*[daniel@clondia.com](mailto:daniel@clondia.com)*

### Synthesis of Nucleo Amino Acids

#### Alanyl Nucleo Amino Acids

An enantioselective preparation of alanyl nucleic acids was first described for the thyminy and adeniny derivatives by Eschenmoser *et al.*<sup>16</sup> Nucleo amino acids **S1** and **S2** were synthesized by nucleophilic ring opening of the butoxycarbonyl (Boc) protected serine lactone **S3**<sup>17,18</sup> with the respective nucleobase (Scheme 1).

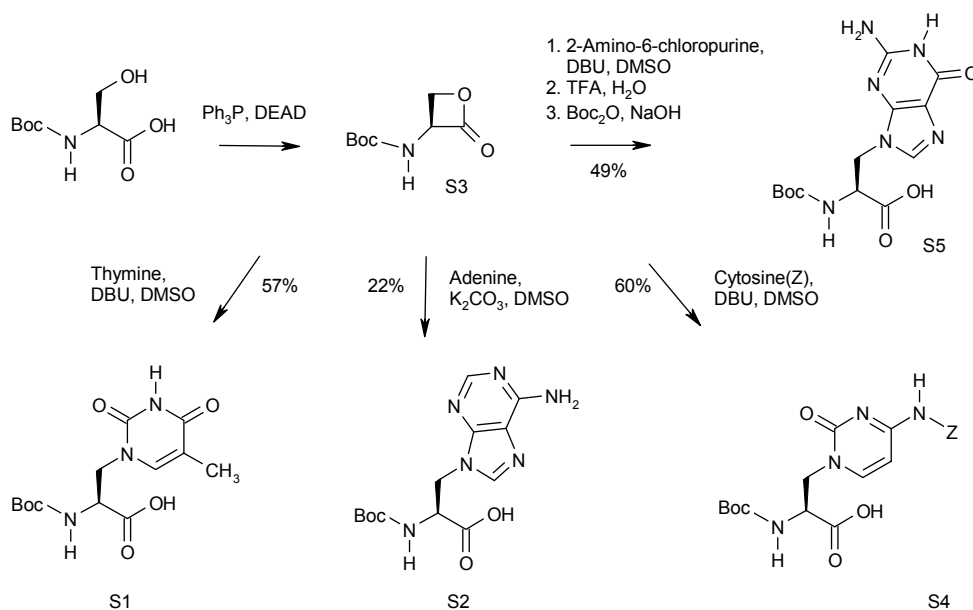

### Scheme S1. Synthesis of the alanyl nucleo amino acids

The benzyloxycarbonyl (Z) protected cytosine and the guanine substituted amino acids **S4** and **S5** were prepared in a similar manner. The exocyclic amine of cytosine had to be Z-protected, whereas 2-amino-6-chloropurine was used as a precursor for guanine. The guaninyl nucleo amino acid **S5** was generated by treatment with TFA followed by Boc-reprotection.

#### (*S*)-*N*-*tert*-Butoxycarbonyl- $\beta$ -(*N*4-benzyloxycarbonyl-1-cytosinyl)alanine **S4**

Under argon DBU (2.12 g, 13.9 mmol) was added to a suspension of *N*4-benzyloxycarbonylcytosine (4.56 g, 18.6 mmol) in anh. DMSO (15 mL). Within 15 min (*S*)-*N*-Boc- $\beta$ -serine lactone<sup>17</sup> (1.74 g, 9.30 mmol), dissolved in DMSO (10.5 mL) was added. After stirring the mixture for 3 h at room temperature the reaction was stopped by addition of AcOH (797  $\mu$ L, 13.9 mmol). Purification by flash chromatography on silica with AcOEt/MeOH/AcOH 9:1: gradient 0-0.05 provided of nucleo amino acid **S4** (2.41 g, 60%, > 98% e.e.) as a white solid (HPLC for H-(*S*)-Ala-(*S*)-AlaC(Z)-OH:  $t_R$  = 26.2 min, gradient 10 - 50% B' in 30 min). mp 188 °C;  $R_f$  [AcOEt/MeOH/H<sub>2</sub>O/AcOH 10:1:1:0.5, saturated NaCl] = 0.31;  $[\alpha]_D^{20}$  -86.3 (*c* 0.7 in MeOH);  $\delta_H$  (400 MHz; [D<sub>6</sub>]DMSO; Me<sub>4</sub>Si) 1.26 (9 H, s, Boc), 3.54 (1 H, m, H- $\alpha$ ), 4.20 (1 H, m, H- $\beta$ ), 4.42 (1 H, d,  $^3J$ (H,H) = 10 Hz, H- $\beta$ ), 5.16 (2 H, s, CH<sub>2</sub>Ph), 6.58 (0.7 H, br, NHBoc), 6.89 (1 H, d,  $^3J$ (H,H) = 6 Hz, H-5), 7.37 (5 H, s, Ph), 7.86 (1 H, d,  $^3J$ (H,H) = 6 Hz, H-6), 10.69 (1 H, br, COOH);  $\delta_C$  (100 MHz; [D<sub>6</sub>]DMSO; Me<sub>4</sub>Si) 28.2 (Boc), 40.6 (C- $\beta$ ), 52.0, 52.8 (C- $\alpha$ ), 66.5 (CH<sub>2</sub>-Ph), 78.1 (Boc), 93.6 (C-5), 128.0 (Ph), 128.3 (Ph), 128.6 (Ph), 136.2 (CO-Z), 150.4 (C-6), 153.4 (C-4), 155.1 (C-2), 155.3 (CONH), 162.8 (COOH);  $\nu_{max}/cm^{-1}$  (KBr) 3400, 3240, 1750, 1700, 1655, 1625, 1370, 1215, 790, 700;  $\lambda_{max}$ (MeOH)/nm 250 ( $\epsilon/dm^3 mol^{-1}$  13 800), 300 (550); ESI-MS *m/z*: 433.1 [M + H]<sup>+</sup>, 865.0 [2M + H]<sup>+</sup>.

#### (*R*)-*N*-*tert*-Butoxycarbonyl- $\beta$ -(*N*4-benzyloxycarbonyl-1-cytosinyl)alanine ent-**S4**

The synthesis followed the procedure for enantiomer **S4**. The analytical data of ent-**S4** and **S4** are identical except for  $[\alpha]_D^{20}$  +95.4 (*c* 0.5 in MeOH) and HPLC for H-(*S*)-Ala-(*R*)-AlaC(Z)-OH:  $t_R$  = 27.0 min, gradient 10 - 50% B' in 30 min.

**(S)-N-tert-Butoxycarbonyl-β-(2-amino-6-chloro-9-puriny)alanine**

DBU (1.56 g, 10.2 mmol) was added over 15 min to a suspension of 2-amino-6-chloropurine (2.05 g, 12.1 mmol) in DMSO (5 mL). After 10 min *N*-Boc-β-serine lactone **S3**<sup>17</sup> (1.74 g, 9.30 mol), dissolved in DMSO (5 mL), was added drop wise and the mixture was stirred for additional 3 h. The reaction was stopped by adding AcOH (585 μL, 10.22 mmol) and the solvent was removed. Purification of the crude product was done by flash chromatography using silica and AcOEt/MeOH/AcOH 8:2: gradient 0-0.05. After coevaporation with toluene the product was obtained as a white solid (2.68 g, 81%). mp 207-212 °C; *R*<sub>f</sub> [CHCl<sub>3</sub>/MeOH/H<sub>2</sub>O/AcOH 70:30:3:0.3] = 0.24; [α]<sub>D</sub><sup>20</sup> -86.3 (*c* 0.6 in MeOH); δ<sub>H</sub> (400 MHz; [D<sub>6</sub>]DMSO; Me<sub>4</sub>Si) 1.05 (1.5 H, s, Boc), 1.26 (7.5 H, s, Boc), 4.15 (1 H, dd, <sup>3</sup>*J*(H,H) = 10 Hz, <sup>2</sup>*J*(H,H) = 14 Hz, H-β), 4.30 (1 H, m, H-α), 4.46 (1 H, dd, <sup>2</sup>*J*(H,H) = 14 Hz, <sup>3</sup>*J*(H,H) = 4 Hz, H-β), 6.90 (2 H, s, NH<sub>2</sub>), 7.00 (1 H, d, <sup>3</sup>*J*(H,H) = 8 Hz, NHBoc), 7.92 (1 H, s, H-8); δ<sub>C</sub> (100 MHz; [D<sub>6</sub>]DMSO; Me<sub>4</sub>Si) 27.6 (Boc), 44.2 (C-β), 53.2 (C-α), 78.5 (Boc), 123.4 (C-5), 143.6 (C-8), 149.3 (C-6), 154.4 (C-2), 155.3 (CONH), 159.9 (C-4), 171.4 (COOH); ν<sub>max</sub>/cm<sup>-1</sup> (KBr) 3400, 3320, 3210, 1695, 1640, 1610, 1160; λ<sub>max</sub>(MeOH)/nm 253 (ε/dm<sup>3</sup> mol<sup>-1</sup> cm<sup>-1</sup> 7 000), 315 (5 700); ESI-MS *m/z*: 357.0 [M + H]<sup>+</sup>, 712.9 [2M + H]<sup>+</sup>.

**(S)-N-tert-Butoxycarbonyl-β-(9-guaniny)alanine S5**

(S)-N-Boc-β-(2-Amino-6-chloro-9-puriny)alanine (2.86 g, 7.51 mmol) was dissolved in a mixture of TFA/H<sub>2</sub>O 3:1 (33 mL) and stirred for 48 h. After completion of the reaction toluene was added and the solvent was evaporated. Exchange of the counterion was done by solvation in 1 N HCl followed by solvent evaporation providing (S)-β-(9-guaniny)alanine (*R*<sub>f</sub> [*i*-propanol/H<sub>2</sub>O/AcOH 5:2:1, saturated NaCl] = 0.10). The crude reaction mixture was used for Boc-protection. A suspension of (S)-β-(9-guaniny)alanine in H<sub>2</sub>O/1N NaOH/dioxane 1:1:2 (48 mL) was cooled to 0 °C and di-*tert*-butyldicarbonate (1.80 g, 8.25 mmol) was added. After stirring for 45 min at 0°C the ice bath was removed. 1N NaOH was added to keep the pH value at 9.0-9.5. After 60 h the solution was acidified to pH 6.5 by adding 1 N HCl. After evaporation of the solvent purification was done by flash chromatography with RP silica (H<sub>2</sub>O/ gradient 10% MeOH each 500 mL) and product **S5** was obtained as white solid (1.53 g, 60%, >99% e.e.). HPLC for H-(S)-Ala-(S)-AlaG-OH: t<sub>R</sub> = 13.9 min, gradient 10 - 20% B' in 30 min; mp 235 °C; *R*<sub>f</sub> [*i*-propanol/H<sub>2</sub>O/AcOH 5:2:1, saturated NaCl] = 0.55; [α]<sub>D</sub><sup>20</sup> -

20.7 (*c* 0.8 in MeOH);  $\delta_{\text{H}}$  (400 MHz; [D<sub>6</sub>]DMSO; Me<sub>4</sub>Si) 1.10 (2 H, s, Boc), 1.27 (7 H, s, Boc), 3.93 (2 H, m, H- $\beta$ , H- $\alpha$ ), 4.42 (1 H, d,  $^3J$  (H,H) = 10 Hz, H- $\beta$ ), 6.17 (1 H, d,  $^3J$  (H,H) = 7 Hz, NHBoc), 6.93 (2 H, s, NH<sub>2</sub>), 7.47 (1 H, s, H-8), 11.57 (1 H, br s, COOH);  $\delta_{\text{C}}$  (100 MHz; [D<sub>6</sub>]DMSO; Me<sub>4</sub>Si) 28.3 (Boc), 45.6 (C- $\beta$ ), 55.6 (C- $\alpha$ ), 77.7 (Boc), 116.3 (C-5), 137.7 (H-8), 151.7 (C-6), 154.1 (C-2), 155.1 (CONH), 157.6 (C-4), 172.4 (COOH);  $\nu_{\text{max}}$ /cm<sup>-1</sup>(KBr) 3360, 3120, 1690, 1610, 1370, 1170;  $\lambda_{\text{max}}$ (MeOH)/nm 259 ( $\epsilon$ /dm<sup>3</sup> mol<sup>-1</sup> cm<sup>-1</sup> 11 700); ESI-MS *m/z*: 339.0 [M + H]<sup>+</sup>, 677.0 [2M + H]<sup>+</sup>.

### **(*R*)-*N*-tert-Butoxycarbonyl- $\beta$ -(9-guaninyl)alanine ent-S5**

The synthesis followed the procedure for enantiomer **S5**. The analytical data of ent-**S5** and **S5** are identical except for  $[\alpha]_{\text{D}}^{20}$ , +14.3 (*c* 1.0 in MeOH) and HPLC for H-(*S*)-Ala-(*R*)-AlaG-OH: *t<sub>R</sub>* = 16.6 min, gradient 10 - 20% B' in 30 min.

### **Homoalanyl Nucleo Amino Acids**

Homoalanyl nucleo amino acids were prepared by substitution of primary bromide **S6** with the nucleobases. Therefore, homoalanyl nucleo amino acids **S7-S11** were chiefly prepared following procedures of Taddei (Scheme S2).<sup>19-22</sup> The  $\gamma$ -bromo amino acid **S6** was generated by photochemical degradation of the Barton-ester **S12** which was prepared from glutamic acid **S13**. Finally, the primary bromide **S6** was substituted by the nucleobases. After separation from the undesired *N*7 (purine) and *N*3 (pyrimidine) regioisomers by chromatography, the C-terminal deprotection of the benzyl protected nucleo amino acids **S14-S17** to the desired nucleo amino acids **S7-S11** was obtained either under hydrogenolytic conditions or using the endopeptidase Chirazyme<sup>®</sup> P-1 (Roche Diagnostics GmbH, Penzberg, Germany). The guanine derivative **S17** was generated from the 2-amino-6-chloropurinyl amino acid **S18** by treatment with TFA. The Boc-group lost during this conversion was attached in the final step to yield amino acid **S11**.

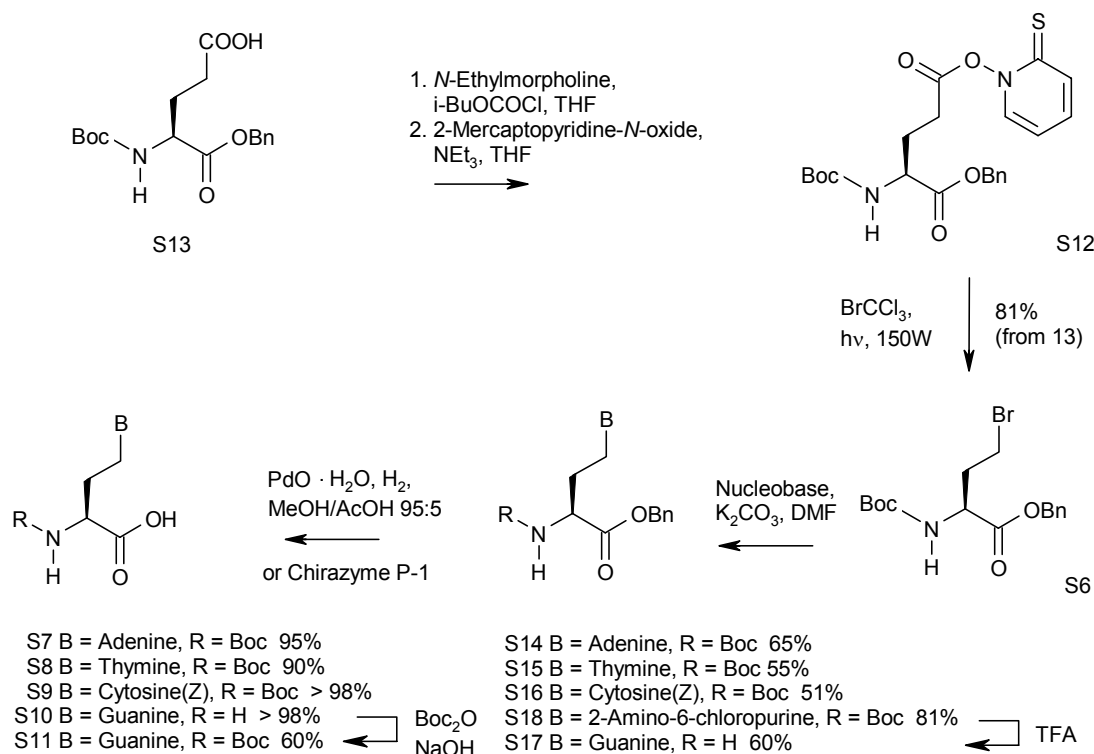

**Scheme S2.** Synthesis of the homoalanyl nucleoside amino acids<sup>19-22</sup>

### (*S*)-*N*-*tert*-Butoxycarbonyl- $\gamma$ -(9-adeninyl)homoalanine **S7**

(*S*)-*N*-Boc- $\gamma$ -(9-adeninyl)homoalanine benzyl ester **S14**<sup>22</sup> (2.00 g, 4.70 mmol) was dissolved in a mixture of MeOH (20 mL) and H<sub>2</sub>O (1 mL) and reduced by PdO·H<sub>2</sub>O (250 mg) within 3 d. The palladium oxide was separated by filtration over celite and washed with MeOH. By extraction with CHCl<sub>3</sub>/H<sub>2</sub>O starting material (1.00 g, 2.35 mmol) was recovered in the organic phase. Evaporation of H<sub>2</sub>O followed by coevaporation with toluene yielded 790 mg (50%, >98% e.e.) amino acid **S7** as a white solid (HPLC for H-(*S*)-Ala-(*S*)-HalA-OH: *t*<sub>R</sub> = 24.3 min, gradient 10 - 15% B' in 30 min). mp 227 °C; *R*<sub>f</sub> [AcOEt/MeOH/H<sub>2</sub>O/AcOH 10:1:1:0.5, saturated NaCl] = 0.43;  $\delta_{\text{H}}$  (400 MHz; [D<sub>6</sub>]DMSO; Me<sub>4</sub>Si) 1.29–1.40 (9 H, s, Boc), 1.95–2.10 (1 H, m, H- $\beta$ ), 2.20–2.35 (1 H, m, H- $\beta$ ), 3.80 (1 H, m, H- $\alpha$ ), 4.19 (2 H, t, <sup>3</sup>*J*(H,H) = 7 Hz, H- $\gamma$ ), 7.17 (2 H, s, NH<sub>2</sub>), 7.25 (1 H, d, <sup>3</sup>*J*(H,H) = 8 Hz, BocNH), 8.02 (1 H, s, H-2), 8.12 (1 H, s, H-8), 12.60 (0.7 H, br s, COOH);  $\delta_{\text{C}}$  (100 MHz; [D<sub>6</sub>]DMSO; Me<sub>4</sub>Si) 28.5, 31.1, 51.3, 78.4, 118.9, 140.9, 152.5, 155.7, 156.1, 173.6;  $\nu_{\text{max}}$ /cm<sup>-1</sup> (KBr) 3450, 3280, 3120, 1730, 1690, 1350;  $\lambda_{\text{max}}$ (MeOH)/nm 266 ( $\epsilon$ /dm<sup>3</sup> mol<sup>-1</sup> cm<sup>-1</sup> 14 800); ESI-MS *m/z*: 337.1 [M + H]<sup>+</sup>; C<sub>14</sub>H<sub>20</sub>N<sub>6</sub>O<sub>4</sub> (336.4) calcd. C 49.99, H 5.99, N 24.99; found C 49.75, H 6.01, N 24.33.

**(*R*)-*N*-*tert*-Butoxycarbonyl- $\gamma$ -(9-adeninyl)homoalanine ent-S7**

The synthesis followed the procedure for enantiomer **S7**. The analytical data of ent-**S7** and **S7** are identical except HPLC for H-(*S*)-Ala-(*R*)-HalA-OH:  $t_R$  = 26.5 min, gradient 10 - 15% B' in 30 min.

**(*S*)-*N*-*tert*-Butoxycarbonyl- $\gamma$ -(*N*4-benzoxycarbonyl-1-cytosinyl)homoalanine **S9****

(*S*)-*N*-Boc- $\gamma$ -(*N*4-Benzoxycarbonyl-1-cytosinyl)homoalanine benzyl ester **S16**<sup>20</sup> (1.83 g, 3.41 mmol) was dissolved in acetone (50 mL) and was added within 2 days dropwise to a solution of Chirazyme P-1 (1 g) in phosphate-buffer (50 mM, pH 7.0). After 20 h the solution was evaporated and amino acid **S9** was isolated as a white solid (1.52 g) by a reversed phase flash chromatography in quantitative yield (>99% e.e.; HPLC for H-(*S*)-Ala-(*S*)-HalC(Z)-OH:  $t_R$  = 29.5 min, 0 - 30% B'). mp 180 °C;  $R_f$  [AcOEt/MeOH/H<sub>2</sub>O/AcOH 10:1:1:0.5, saturated NaCl] = 0.43;  $[\alpha]_D^{20}$  -8.5 (*c* 0.4 in MeOH);  $\delta_H$  (400 MHz; [D<sub>6</sub>]DMSO; Me<sub>4</sub>Si) 1.34 (9 H, s, Boc), 1.78–2.03 (2 H, m, H- $\beta$ ), 3.52 (1 H, m, H- $\alpha$ ), 3.79 (2 H, t,  $^3J$  (H,H) = 7 Hz, H- $\gamma$ ), 5.17 (2 H, s, CH<sub>2</sub>Ph), 6.03 (1 H, d,  $^3J$  (H,H) = 6 Hz, BocNH), 6.92 (1 H, d,  $^3J$  (H,H) = 7 Hz, H-5), 7.30–7.45 (5 H, m, Ph), 8.9 (1 H, d,  $^3J$  (H,H) = 7 Hz, H-6), 10.6 (0.7 H, br, COOH);  $\delta_C$  (100 MHz; [D<sub>6</sub>]DMSO; Me<sub>4</sub>Si) 28.3 (Boc), 32.4 (C- $\beta$ ), 47.6 (C- $\gamma$ ), 53.2 (C- $\alpha$ ), 66.5 (CH<sub>2</sub>Ph), 77.6 (Boc), 93.8 (C-5), 128.0 (Ph), 128.3 (Ph), 128.6 (Ph), 136.2 (CO-Z), 150.3 (C-6), 153.4 (C-4), 155.0 (C-2), 162.7 (CONH), 173.3 (COOH);  $\nu_{max}/cm^{-1}$  (KBr) 3400, 1750, 1700, 1655, 1625, 1370, 790, 700;  $\lambda_{max}$ (MeOH)/nm 245 ( $\epsilon/dm^3 mol^{-1}$  15 700), 300 (6 000); ESI-MS *m/z*: 469.2 [M + Na]<sup>+</sup>, 915.2 [2M + Na]<sup>+</sup>.

**(*R*)-*N*-*tert*-Butoxycarbonyl- $\gamma$ -(*N*4-benzoxycarbonyl-1-cytosinyl)homoalanine ent-S9**

The synthesis followed the procedure for enantiomer **S9**. The analytical data of ent-**S9** and **S9** are identical except for  $[\alpha]_D^{20}$  +4.2 (*c* 0.6 in MeOH) and HPLC for H-(*S*)-Ala-(*R*)-HalC(Z)-OH:  $t_R$  = 28.4 min, 0 - 30% B'.

**(*S*)-*N*-*tert*-Butoxycarbonyl- $\gamma$ -(9-guaninyl)homoalanine **S11****

PdO·H<sub>2</sub>O (600 mg) was added to a solution of (*S*)- $\gamma$ -(9-guaninyl)homoalanine benzyl ester **S17**<sup>22</sup> in MeOH (70 mL) and AcOH (3.7 mL) under argon. After saturation with hydrogen, the reaction mixture was activated with ultra sound and stirred for 2 h. The mixture was centrifuged and the catalyst washed several times with MeOH.

The combined solutions were coevaporated with toluene and the desired amino acid **S10** was isolated as a white solid (1.08 g, 93%);  $R_f$  [*i*-propanol/H<sub>2</sub>O/AcOH 5:2:1, saturated NaCl] = 0.16;  $\delta_H$  (250 MHz; [D<sub>6</sub>]DMSO; Me<sub>4</sub>Si) 2.15–2.40 (2 H, m, H- $\beta$ ), 3.77 (1 H, t,  $^3J$ (H,H) = 7 Hz, H- $\alpha$ ), 4.15 (2 H, t,  $^3J$ (H,H) = 7 Hz, H- $\gamma$ ), 6.60 (2 H, br s, NH<sub>2</sub>), 7.89 (1 H, s, H-8), 8.40 (2 H, br s, NH<sub>2</sub>). A suspension of the crude (*S*)- $\gamma$ -(9-guaninyl)-homoalanine **S10** in H<sub>2</sub>O/1N NaOH/dioxane 1:1:2 (30 mL) was cooled to 0°C and di-*tert*-butyldicarbonate (1.08 g, 4.95 mmol) was added. After stirring 45 min at 0°C the ice bath was removed and the pH was kept at 9.0–9.5 with 1N NaOH. After 1.5 h the solution was acidified to pH 6.5 by adding 1 N HCl. After evaporation of the solvent the purification was done by flash chromatography with RP silica and the desired nucleo amino acid **S11** was obtained as a white solid (0.95 g, 60%, >96% e.e.); HPLC for H-(*S*)-Ala-(*S*)-HalG-OH:  $t_R$  = 25.3 min, gradient 10 - 15% B' in 30 min). mp 257 °C;  $R_f$  [*i*-propanol/H<sub>2</sub>O/AcOH 5:2:1, saturated NaCl] = 0.55;  $[\alpha]^{20}_D$  +9.7 (*c* 0.3 in MeOH);  $\delta_H$  (500 MHz; [D<sub>6</sub>]DMSO; Me<sub>4</sub>Si) 1.35 (9 H, s, Boc), 1.85–2.15 (2 H, m, H- $\beta$ ), 3.63 (1 H, m, H- $\alpha$ ), 3.94 (2 H, m, H- $\gamma$ ), 6.15 (1 H, d,  $^3J$ (H,H) = 7 Hz, BocNH), 6.98 (2 H, s, NH<sub>2</sub>), 7.64 (1 H, s, H-8), 11.67 (1 H, br s, COOH);  $\delta_C$  (125 MHz; [D<sub>6</sub>]DMSO; Me<sub>4</sub>Si) 28.4 (Boc), 34.1 (C- $\beta$ ), 40.7 (C- $\gamma$ ), 53.3 (C- $\alpha$ ), 77.8 (Boc), 116.7 (C-5), 137.4 (C-8), 151.3 (C-6), 154.4 (C-2), 155.5 (CONH), 157.6 (C-4), 174.3 (COOH);  $\nu_{max}/cm^{-1}$  (KBr) 3400, 3320, 3180, 1690, 1605, 1170;  $\lambda_{max}$ (MeOH)/nm 259 ( $\epsilon/dm^3\ mol^{-1}\ cm^{-1}$  12 500); ESI-MS *m/z*: 353.2 [M + H]<sup>+</sup>, 705.1 [2M + H]<sup>+</sup>, 727.1 [2M + Na]<sup>+</sup>.

#### **(*R*)-*N*-*tert*-Butoxycarbonyl- $\gamma$ -(9-guaninyl)homoalanine ent-S11**

The synthesis followed the procedure for enantiomer **S11**. The analytical data of ent-**S11** and **S11** are identical except for  $[\alpha]^{20}_D$  +7.0 (*c* 0.8 in MeOH) and HPLC for H-(*S*)-Ala-(*R*)-HalG-OH:  $t_R$  = 28.0 min, gradient 10 - 15% B' in 30 min.
